# Supplementary material for: Multi-hierarchical responsive polymers: stepwise oxidation of a selenium- and tellurium-containing block copolymer with sensitivity to both chemical and electrochemical stimuli
Source: Royal Society of Chemistry journal article supplement (doi:10.1039/c7py00971b), 2017-01-01
Supplement: c7py00971b1.pdf [file c7py00971b1.pdf]

## Electronic Supplementary Information

# Multi-hierarchical Responsive Polymers: Stepwise Oxidation of a Selenium- and Tellurium-Containing Block Copolymer with Sensitivity to both Chemical and Electrochemical Stimuli

Lu Wang, Wencong Wang, Wei Cao, Huaping Xu\*

Key Laboratory of Organic Optoelectronics and Molecular Engineering, Department of Chemistry,  
Tsinghua University, Beijing 100084, People's Republic of China

\*Corresponding author. E-mail: xuhuaping@mail.tsinghua.edu.cn

### Characterization and control experiment

- <sup>1</sup>H NMR characterization of the selenium- and tellurium-containing copolymer Se-Te-PEG2000.

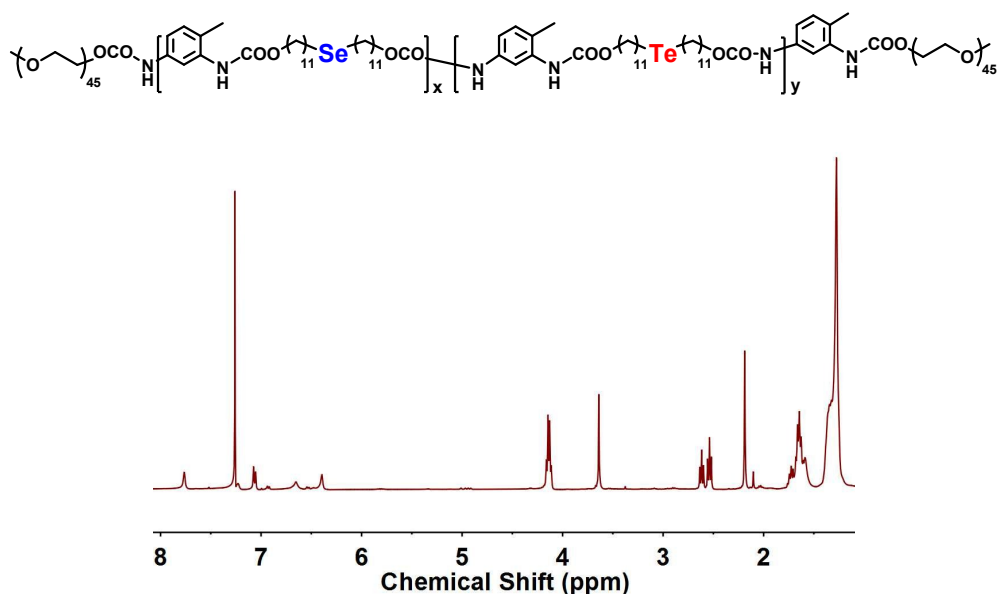

**Figure S1.** <sup>1</sup>H NMR spectrum of Se-Te-PEG2000 (400 MHz, CDCl<sub>3</sub>).

$\delta$ (ppm): 4.15 (t, NH<sub>2</sub>COOCH<sub>2</sub>(CH<sub>2</sub>)<sub>10</sub>Se), 4.13 (t, NH<sub>2</sub>COOCH<sub>2</sub>(CH<sub>2</sub>)<sub>10</sub>Te), 3.64 (t, OCH<sub>2</sub>CH<sub>2</sub> of PEG), 2.62 (t, TeCH<sub>2</sub>CH<sub>2</sub>), 2.54 (t, SeCH<sub>2</sub>CH<sub>2</sub>), 2.19 (SeCH<sub>2</sub>CH<sub>2</sub>, TeCH<sub>2</sub>CH<sub>2</sub>), 1.77-1.19 (m, NHCOOCH<sub>2</sub>(CH<sub>2</sub>)<sub>8</sub>CH<sub>2</sub>CH<sub>2</sub>Se, NHCOOCH<sub>2</sub>(CH<sub>2</sub>)<sub>8</sub>CH<sub>2</sub>CH<sub>2</sub>Te).

- GPC characterization of the selenium- and tellurium-containing copolymer.

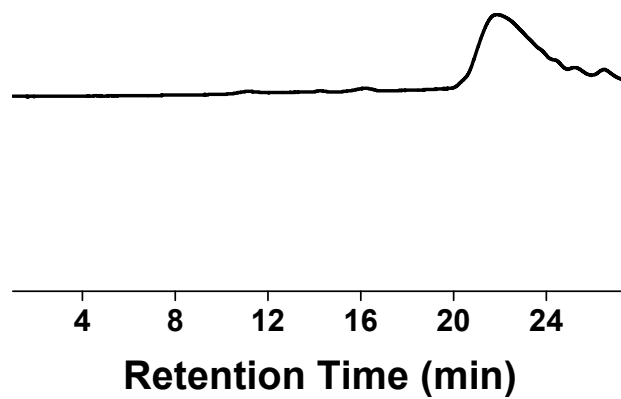

**Figure S2.** GPC plot of Se-Te-PEG2000.

3. CAC of Se-Te-PEG2000 measured by the concentration-dependent DLS measurement.

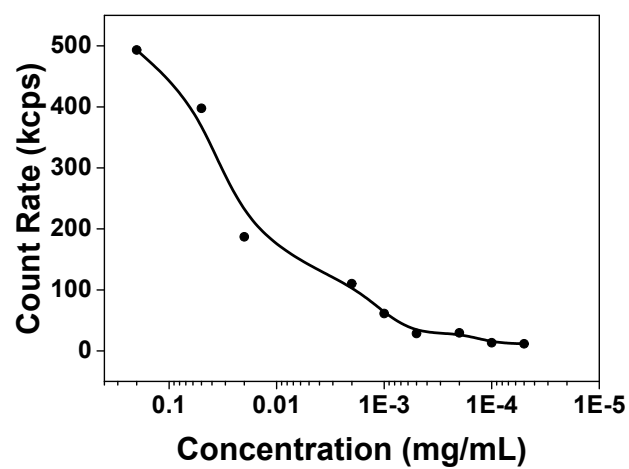

**Figure S3.** CAC measurements by the concentration-dependent DLS.

4. DLS measurements of micelle suspension before and after oxidation by  $\text{H}_2\text{O}_2$  for 5 h.

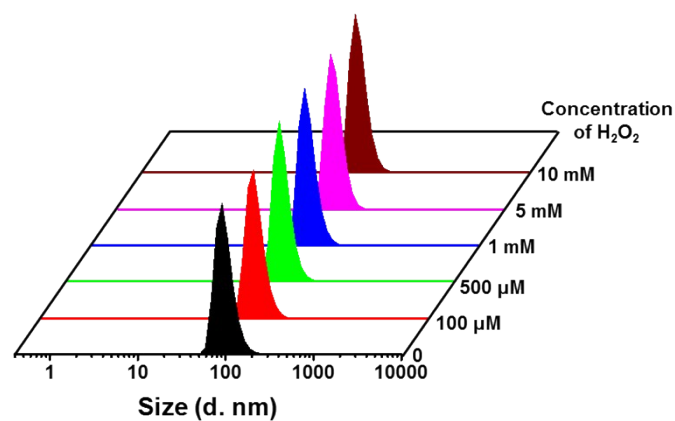

**Figure S4.** DLS plots of micelle suspension before and after oxidation by  $\text{H}_2\text{O}_2$  of different concentration for 5 h.

5. Cryo-TEM images of micelle suspension after oxidation  $\text{H}_2\text{O}_2$  of different concentrations and periods.

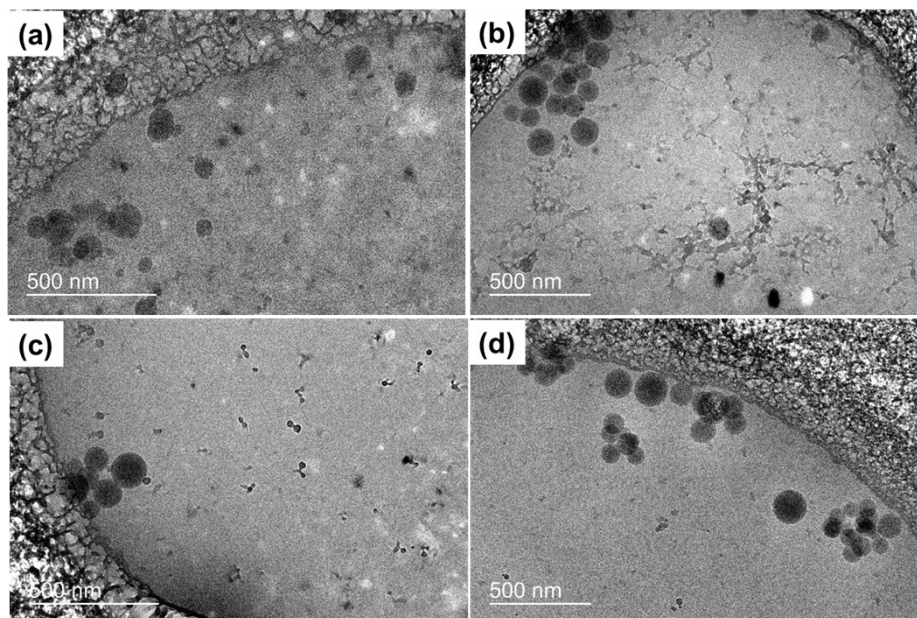

**Figure S5.** Cryo-TEM images of the Se-Te-PEG2000 after oxidation by  $\text{H}_2\text{O}_2$  of different concentration and period. (a) 500  $\mu\text{M}$ , 12 h. (b) 1 mM, 12 h. (c) 5 mM, 12 h. (d) 10 mM, 12 h. Scale bar: 500 nm.

6. Current-time curves during electrochemical oxidation process of Se-Te-PEG2000.

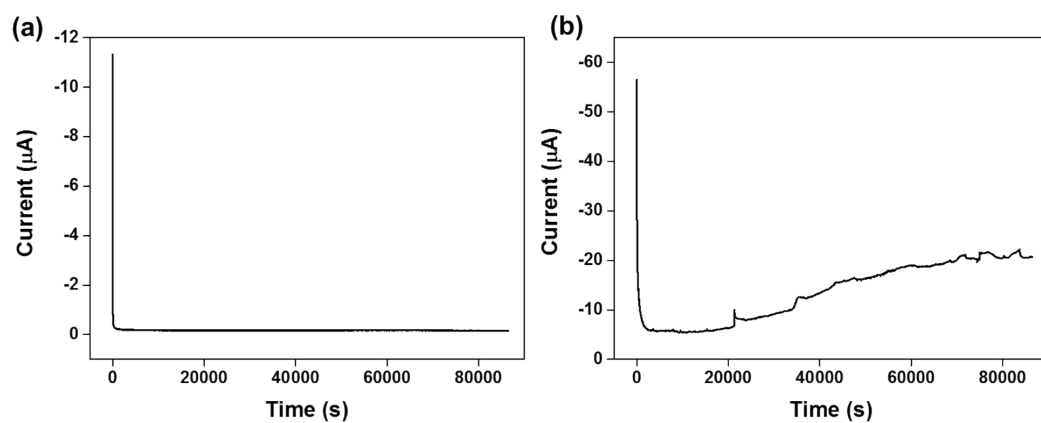

**Figure S6.** Current-time curves during electrochemical oxidation of Se-Te-PEG2000. (a) 0.6 V, 24 h. (b) 1.2 V, 24 h.
